# Supplementary material
Source: HighWire-hosted journal article supplement (https://www.jneurosci.org/highwire/filestream/598506/field_highwire_adjunct_files/5/Supplemental_Materials.pdf)
Supplement: Supplemental_Materials.pdf [file Supplemental_Materials.pdf]

## Supplemental Materials

### Materials and Methods

Low-power images for immunofluorescence and *in situ* hybridization were taken with a dissecting microscope (SZX-12, Olympus) or a bright-field microscope (AX70, Olympus) equipped with a digital camera (DP70, Olympus).

For immunoblot, adult mouse brains were freshly removed from the skull under deep pentobarbital anesthesia (100 mg/kg of body weight, i.p.). They were homogenized using a Potter homogenizer with 15 strokes at 1000 r.p.m. in 10 volumes of ice-cold homogenizer buffer containing 0.32 M sucrose, 1 mM EDTA, 1 mM EGTA, 10 mM Tris-HCl (pH 7.2), and 0.4 mM phenylmethylsulfonyl fluoride. The protein concentration was determined by the Lowry's method. The homogenates were denatured by 50 mM ( $\pm$ )-dithiothreitol at 65 °C for 15 min. Proteins (20  $\mu$ g/lane) were separated by sodium dodecyl sulfate-polyacrylamide gel electrophoresis, and electroblotted onto nitrocellulose membranes (BioTraceNT; PALL, Ann Arbor, MI, USA). After blocking with 5% skimmed milk for 30 min, membranes were incubated for 2 hr with the primary antibodies (1  $\mu$ g/ml). Tris-buffered saline (pH 7.5) containing 0.1% Tween 20 was used for diluent and washing buffer. Immunoreaction was visualized with the ECL chemiluminescence detection system (Amersham Biosciences).

Under deep anesthesia, brains for *in situ* hybridization were freshly taken and immediately frozen in powdered dry ice. Frozen sections were prepared on a cryostat (20  $\mu$ m in thickness; CM1900; Leica, Nussloch, Germany), mounted on silane-coated glass slides (Muto-Glass, Tokyo, Japan), air-dried, and stored at -80 °C until use for hybridization. Probes were synthesized against nucleotide residues 198-242, 631-675, 839-883 and 1081-1125 of the mouse CB<sub>1</sub> cDNA (Genbank, U22948), 1381-1430 of the

mouse tyrosine hydroxylase cDNA (M69200), 136-180 of the mouse serotonin transporter cDNA (AF013604). They were labeled using terminal deoxyribonucleotidyl transferase (Invitrogen, Carlsbad, CA). Sections were treated at room temperature with the following incubation media: 4% paraformaldehyde in 0.1M sodium phosphate buffer (pH 7.2) for 10 min, 2 mg/ml glycine-phosphate-buffered saline (pH 7.2) for 10 min, acetylation with 0.25% acetic anhydride in 0.1 M triethanolamine-HCl (pH 8.0) for 10 min, and prehybridization buffer containing 50% formamide, 50 mM Tris-HCl (pH 7.5), 0.02% Ficoll, 0.02% polyvinylpyrrolidone, 0.02% bovine serum albumin, 0.6 M NaCl, 0.25% SDS, 200  $\mu$ g/ml tRNA, 1 mM EDTA, and 10% dextran sulfate for 1 hr. Hybridization was performed at 42 °C for 12 hr in the prehybridization buffer supplemented with a mixture of [<sup>33</sup>P]dATP-labeled antisense oligonucleotide probes (10,000 cpm/ $\mu$ l for each). After confirming the same pattern of hybridization, four CB<sub>1</sub> probes were mixed into cocktail to increase detection sensitivity. Slides were washed twice at 55 °C for 40 min in 0.1 x SSC containing 0.1% sarcosyl. Sections were exposed to NTB-2 nuclear track emulsion (Kodak, Rochester, NY) for 4 weeks.

See procedures for immunofluorescence in the main text.

## Figure Legends

**Supplemental Fig. S1.** Specificity of antibody against DAGL $\alpha$  (*A-C*), mGluR<sub>5</sub> (*D-F*), or CB<sub>1</sub> (*G-I*). *A, D, G.* Immunoblot with rabbit DAGL $\alpha$ , rabbit mGluR<sub>5</sub>, and guinea pig CB<sub>1</sub> antibodies using protein extracts from the adult mouse brain. The size of standard protein markers is shown to the left (kDa). Note selective detection of single protein bands at 105 kDa, 160kDa, and 47 kDa, respectively, whose size is consistent with

previous reports (Shigemoto et al., 1997; Fukudome et al., 2004; Yoshida et al., 2006). **B, E, H.** Immunofluorescence in parasagittal forebrain sections. **C, F, I.** Immunofluorescence in coronal forebrain sections. In the basal ganglia, DAGL $\alpha$  and mGluR<sub>5</sub> are high to moderate in the striatum but low in the globus pallidus and substantia nigra, whereas CB<sub>1</sub> is very high in the substantia nigra (SN), high in the globus pallidus (GP), and moderate in the striatum (St). Within the striatum, CB<sub>1</sub> and DAGL $\alpha$  immunoreactivities show higher distribution in the dorsolateral portion than in the remaining portions. These regional distributions are consistent with previous studies by ligand binding, *in situ* hybridization, and immunohistochemistry (Herkenham et al., 1991; Mailleux and Vanderhaeghen, 1992; Shigemoto et al., 1993; Matsuda et al., 1993; Testa et al., 1994, 1995; Pettit et al., 1998; Tsou et al., 1998; Katona et al., 1999; Egertova and Elphick, 2000; Hohmann and Herkenham, 2000; Matyas et al., 2006; Yoshida et al., 2006). Insets indicate the lack of immunofluorescent signals with use of DAGL $\alpha$  antibody preabsorbed with the antigen (**B**) and in gene knockout brain lacking mGluR<sub>5</sub> (**E**), or CB<sub>1</sub> (**H**). Cx, cortex; Hi, hippocampus; Th, thalamus. Scale bars, 1 mm.

**Supplemental Fig. S2.** mGluR<sub>1</sub> $\alpha$  is low in medium spiny (MS) neurons and high in parvalbumin-positive interneurons. **A.** Immunofluorescence for mGluR<sub>1</sub> $\alpha$  in a parasagittal forebrain section showing that mGluR<sub>1</sub> $\alpha$  is high in the thalamus, moderate in the neocortex, globus pallidus and hippocampus, and low in the striatum. This characteristic immunolabeling is consistent with previous reports (Martin et al., 1992, Shigemoto et al., 1992; Testa et al., 1994, 1995, 1998; Petralia et al., 1997, Berthele et al., 1998). **B.** Triple immunofluorescence for mGluR<sub>1</sub> $\alpha$  (red), D<sub>1</sub>R (green), and D<sub>2</sub>R (blue). Most perikarya of D<sub>1</sub>R- and D<sub>2</sub>R-positive neurons, which are very likely to be

MS neurons, are almost negative for mGluR<sub>1</sub>α. However, mGluR<sub>1</sub>α-positive puncta with low intensity are distributed around the surface of D<sub>1</sub>R- and D<sub>2</sub>R-positive elements in the neuropil, suggesting low mGluR<sub>1</sub>α expression in MS neurons. Asterisk and arrowheads indicate soma and dendrites, respectively, of putative parvalbumin (PV)-positive interneurons, which are intense for mGluR<sub>1</sub>α and express D<sub>2</sub>R. **C-E**. Double immunofluorescence for mGluR<sub>1</sub>α (red) with PV (**C**, green), high-affinity choline transporter (**D**, CHT, green), or nitric oxide synthase (**E**, NOS, green). Note that mGluR<sub>1</sub>α is intense in PV interneurons (asterisk and arrowheads), and moderate in CHT-positive cholinergic interneuron (asterisk) and NOS-positive interneuron (asterisk and arrowhead). Scale bars, **A**, 1mm, **B-E**, 10 μm.

**Supplemental Fig. S3.** Effect of WIN 55,212-2 in the presence of THL. **A**. Representative data demonstrating suppression of IPSC by WIN 55,212-2 in the presence of THL (10 μM) following preincubation with THL (20 μM). Each point represents the average of 3 consecutive traces. Depolarizing pulses with duration of 5 s was applied before WIN 55,212-2 (1 μM) application at the time points indicated with upward arrows. *Inset*, example traces of IPSCs showing no DSI and WIN 55,212-2-induced suppression. Traces before and after treatment are superimposed. Calibration bars, 100 pA and 10 ms. **B**. Summary bar graph for WIN-induced suppression of IPSCs. Bars represent effects of WIN 55,212-2 in control solution and in the presence of THL (10 μM) following preincubation with THL (20 μM). Effects are shown as the percentage of the control values before WIN application. Numbers of tested cells are indicated in parentheses.

**Supplemental Fig. S4.** Multiple immunofluorescence for CB<sub>1</sub> (red) with various neurochemical markers (green). **A-G.** The lack of CB<sub>1</sub> staining in semithin cryosections prepared from the CB<sub>1</sub>-knockout striatum. These images were taken as negative control experiments for Fig. 8B-H in the main text. **H-L.** CB<sub>1</sub> distribution in particular striatal neurons. Weak CB<sub>1</sub> immunoreactivity is present in neuronal perikarya and terminals labeled for glutamic acid decarboxylase (GAD, arrows, **H**), but absent from those labeled for high-affinity choline transporter (CHT, **I**; Narushima et al., 2007) and calretinin (CR, **L**). CB<sub>1</sub> is detected at extremely low levels in perikarya of nitric oxide synthase (NOS)-positive interneurons (arrows, **J**), and in their axonal terminals labeled for NOS and VGAT (arrowheads, **K**). Scale bars, **A-G, K**, 2 μm; **H-J, L**, 10 μm.

**Supplemental Fig. S5.** *In situ* hybridization for CB<sub>1</sub> mRNA in the striatum and neural regions projecting to the striatum. CB<sub>1</sub> mRNA (**A-G, I, J, L, M, O**), tyrosine hydroxylase (TH) mRNA (**H, N**), and plasmalemmal serotonin transporter (HTT) mRNA (**K**). Emulsion-dipped sections were photographed in the dark-field (**A, C, E, G, H, J, K, M, N**) or bright-field (**B, D, F, I, L, O**) microscopy. In bright-field micrographs, sections were counterstained with pyronine. Principal neurons in respective regions are labeled either positively (arrows) or negatively (arrowheads). **A, B.** Striatum (St). Note a dorsolateral-to-ventromedial gradient in CB<sub>1</sub> mRNA expression. **C, D.** Cortex (Cx). Moderate expression is seen on pyramidal neurons in the layer V. **E, F.** Parafascicular thalamic nucleus (PF). **G-I.** Substantia nigra pars compacta (SNc). **J-L.** Dorsal raphe nucleus (DR). **M-O.** Locus ceruleus (LC). In this picture, CB<sub>1</sub> mRNA is detected in small-to-medium neurons of the LC (arrows), but not in large neurons (arrowheads),

suggestive of CB<sub>1</sub> mRNA expression in interneurons. Scale bars, *A, C, E, G, H, J, K*, 1 mm; *M, N*, 500 μm; *B, D, I, L, O*, 20 μm; *F*, 10 μm.

## REFERENCES

Berthele A, Laurie DJ, Platzer S, Zieglgansberger W, Tolle TR, Sommer B (1998) Differential expression of rat and human type I metabotropic glutamate receptor splice variant messenger RNAs. *Neuroscience* 85:733-749.

Egertova M, Elphick MR (2000) Localisation of cannabinoid receptors in the rat brain using antibodies to the intracellular C-terminal tail of CB. *J Comp Neurol* 422:159-171.

Fukudome Y, Ohno-Shosaku T, Matsui M, Omori Y, Fukaya M, Tsubokawa H, Taketo MM, Watanabe M, Manabe T, Kano M (2004) Two distinct classes of muscarinic action on hippocampal inhibitory synapses: M2-mediated direct suppression and M1/M3-mediated indirect suppression through endocannabinoid signalling. *Eur J Neurosci* 19:2682-2692.

Herkenham M, Lynn AB, Johnson MR, Melvin LS, de Costa BR, Rice KC (1991) Characterization and localization of cannabinoid receptors in rat brain: a quantitative *in vitro* autoradiographic study. *J Neurosci* 11:563-583.

Hohmann AG, Herkenham M (2000) Localization of cannabinoid CB(1) receptor mRNA in neuronal subpopulations of rat striatum: a double-label *in situ* hybridization

study. *Synapse* 37:71-80.

Katona I, Sperlagh B, Sik A, Kafalvi A, Vizi ES, Mackie K, Freund TF (1999) Presynaptically located CB1 cannabinoid receptors regulate GABA release from axon terminals of specific hippocampal interneurons. *J Neurosci* 19:4544-4558.

Mailleux P, Vanderhaeghen JJ (1992) Localization of cannabinoid receptor in the human developing and adult basal ganglia. Higher levels in the striatonigral neurons. *Neurosci Lett* 148:173-176.

Martin LJ, Blackstone CD, Huganir RL, Price DL (1992) Cellular localization of a metabotropic glutamate receptor in rat brain. *Neuron* 9:259-270.

Matsuda LA, Bonner TI, Lolait SJ (1993) Localization of cannabinoid receptor mRNA in rat brain. *J Comp Neurol* 327:535-550.

Matyas F, Yanovsky Y, Mackie K, Kelsch W, Misgeld U, Freund TF (2006) Subcellular localization of type 1 cannabinoid receptors in the rat basal ganglia. *Neuroscience* 137:337-361.

Narushima M, Uchigashima M, Fukaya M, Matsui M, Manabe T, Hahimoto K, Watanabe M, Kano M (2007) Tonic enhancement of endocannabinoid-mediated retrograde suppression of inhibition by cholinergic interneuron activity in the striatum. *J Neurosci* 27:496-506.

Petralia RS, Wang YX, Singh S, Wu C, Shi L, Wei J, Wenthold RJ (1997) A monoclonal antibody shows discrete cellular and subcellular localizations of mGluR1 alpha metabotropic glutamate receptors. *J Chem Neuroanat* 13:77-93.

Pettit DA, Harrison MP, Olson JM, Spencer RF, Cabral GA (1998) Immunohistochemical localization of the neural cannabinoid receptor in rat brain. *J Neurosci Res* 51:391-402.

Shigemoto R, Nakanishi S, Mizuno N (1992) Distribution of the mRNA for a metabotropic glutamate receptor (mGluR1) in the central nervous system: an in situ hybridization study in adult and developing rat. *J Comp Neurol* 322:121-135.

Shigemoto R, Nomura S, Ohishi H, Sugihara H, Nakanishi S, Mizuno N (1993) Immunohistochemical localization of a metabotropic glutamate receptor, mGluR5, in the rat brain. *Neurosci Lett* 163:53-57.

Shigemoto R, Kinoshita A, Wada E, Nomura S, Ohishi H, Takada M, Flor PJ, Neki A, Abe T, Nakanishi S, Mizuno N (1997) Differential presynaptic localization of metabotropic glutamate receptor subtypes in the rat hippocampus. *J Neurosci* 17:7503-7522.

Tanaka J, Nakagawa S, Kushiya E, Yamasaki M, Fukaya M, Iwanaga T, Simon MI, Sakimura K, Kano M, Watanabe M (2000) Gq protein alpha subunits G $\alpha$ q and G $\alpha$ 11



are localized at postsynaptic extra-junctional membrane of cerebellar Purkinje cells and hippocampal pyramidal cells. *Eur J Neurosci* 12:781-792.

Testa CM, Standaert DG, Young AB, Penney JB Jr (1994) Metabotropic glutamate receptor mRNA expression in the basal ganglia of the rat. *J Neurosci* 14:3005-3018.

Testa CM, Standaert DG, Landwehrmeyer GB, Penney JB Jr, Young AB (1995) Differential expression of mGluR5 metabotropic glutamate receptor mRNA by rat striatal neurons. *J Comp Neurol* 354:241-252.

Testa CM, Friberg IK, Weiss SW, Standaert DG (1998) Immunohistochemical localization of metabotropic glutamate receptors mGluR1a and mGluR2/3 in the rat basal ganglia. *J Comp Neurol* 390:5-19.

Tsou K, Brown S, Sanudo-Pena MC, Mackie K, Walker JM (1998) Immunohistochemical distribution of cannabinoid CB1 receptors in the rat central nervous system. *Neuroscience* 83:393-411.

Yoshida T, Fukaya M, Uchigashima M, Miura E, Kamiya H, Kano M, Watanabe M (2006) Localization of diacylglycerol lipase-alpha around postsynaptic spine suggests close proximity between production site of an endocannabinoid, 2-arachidonoyl-glycerol, and presynaptic cannabinoid CB1 receptor. *J Neurosci* 26:4740-4751.
